# Supplementary material for: Connecting the Dots in the Neuroglobin-Protein Interaction Network of an Unstressed and Ferroptotic Cell Death Neuroblastoma Model
Source: PubMed Central journal article supplement (PMC6721670; doi:10.3390/cells8080873), 2019-08-11
Supplement: cells-08-00873-s001.pdf [file cells-08-00873-s001.pdf]

## Supplementary Information

```
ATGGAAGCGCCCGGAGCCCGAGCTGATCCGGCAGAGCTGGCGGGCAGTGAGCCGCAGCCCGCTGGAGCACCGGCACCGTCTGTTTGC CAGGCTGTTTGCCTGGAGCCTGACCTGCTGCCCTCTTCCAGTACAACTGCCGC
TACCTCGCGGGCTCGGGCTCGACTAGGCCGTCTCGACCGCCCGTCACTCGGCCTCGGGCGACCTCGTGCCGGCAGGACAAACGGTCCGACAAACGGGACCTCGGACTGGACGACGGGGAGAAAGTTCATGTTGACGGCG
CAGTTCCTCCAGCCAGAGACTGTCTCTCTCGCCTGAGTTCCTGGACCACATCAGGAAGGTGATGCTCGTGATGATGCTGCAGTGACCAATGTGGAAGACCTGTCTCTCACTGGAGGAGTACCTTGC CAGCC TGGCAGG
GTCAAGAGGTCGGGTCTCTCGACAGAGAGGAGCGGACTCAAGGACCTGGTGTATGCTCTTCCACTACGAGCACTAACTACGACGTCACCTGGTTACACCTTCTGGACAGGAGTGAACCTCTCATGGAACGGTCGGACCCGTCC
AAGCACCGGGCAGTGGTGTAACTCAGCTCTTCTCGACAGTGGGTGAGTCTCTGCTCTACATGCTGGAGAAAGTGTCTGGGCCCTGCCCTTACACACAGCCACACGGGCTGCC TGGAGCCAACTCTACGGGCCGTAGTG
TTCGTGGCCCGTACCCACACTTCGAGTCGAGGAAAGCTGTCAACCCTCAGBACGAGATGTACGACCTCTTACAGACCCGGGACGGAAAGTGTGGTGGTGTGCCCGACGGACCTCGGTTGAGATGCCCGGCATCAC
CAGGCCATGAGTCGAGGCTGGGATGGCGAGCGGATCCACCGGTCCGCACCATGGTGAGCAAGGGCGAGGAGCTTTCACCGGGTGGTGCCTATCTGGTTCGAGCTGGA CCGCGACGTAACCGGCCAAAGTTCAGCGTG
GTCCGGTACTCAGCTCCGACCTACCGCTCGCCTAGTGGCCAGCGGTGGTACCCTGTTCCCGCTCTCTCGACAAAGTGGCCCCACACCGGTAAGGACAGCTCGA CCTGCCCTGCA TTTGCCGGTGTTCAGTCCGAC
TC CCGCGAGGGCCGAGGGCGATGCCACCTACGGCAAGCTGACCCTGAAAGTTCATCTGCACCCACCGGCAAGCTGCCCGTGCC CACCCCTCGTGAC CACCCGACCTACGGCGTGCAGTGCTTCAGCCGCTACCCCGAC
AGGCCGCTCCCGCTCCCGCTACCGTGGATGCCGTTTCGACTGGGACTTCAAGTAGACGTGGTGGCCGTTTCGACGGGCAAGGGACCGGGTGGGAGCACTGGTGGGACTGGATGCCGACGTCAGAAATCGGCATGGGGCTG
CACATGAAGCAGCAGACTTCTTCAAGTCCGCATGCCCGAAGGCTACGTCCAGGAGCGCACATCTTCTTCAAGGACGACGGCAACT
GTGATCTTGTGTGCTGAAGAAGTTCAGCCGGTACGGGCTTCCGATGCAGGTCCTCGCGTGGTAGAAGAAGTTCCTGCTGCCGTTGA
```

**Figure S1.** DNA sequence of the hNgb-EGFP fusion protein. Sequence of the coding region of human Ngb (NM\_021257.3) ligated in the pEGFP-N1 vector (Clontech), as verified by means of Sanger sequencing.

**Table S1.** Primers used for qPCR analysis.

| Housekeeping genes      |          |                           |                           |
|-------------------------|----------|---------------------------|---------------------------|
|                         | ACTB     | F-GCCGCCAGCTCACCAT        | R-TCGATGGGGTACTTCAGGGT    |
|                         | B2M      | F-AGCAGCATCATGGAGGTTTG    | R-AGCCCTCCTAGAGCTACCTG    |
| Transcripts of interest |          |                           |                           |
|                         | CHAC1    | F-GAACCCCTGGTTACCTGGGC    | R-CGCAGCAAGTATTCAAGGTTGT  |
|                         | Ferritin | F-ATTTCGACCGCGATGATGTGG   | R-GAACCCAGGGCATGAAGATCC   |
|                         | hNgb     | F-GAAGCACCGGGCAGTG        | R-AGACACTTCTCCAGCATGTAGAG |
|                         | HO1      | F-CCAGCGGGCCAGCAACAAAGTGC | R-AAGCCTTCAGTGCCACGGTAAGG |
|                         | NRF2     | F-TCCAGTCAGAAACCAGTGGAT   | R-GAATGTCTGCGCCAAAAGCTG   |
|                         | NUBP2    | F-CAGAGCATCTCGTCTCATGTCT  | R-TATCAGCGCGTTTTTCTTGGG   |
|                         | SLC7A11  | F-AGCAGCAGCAGCAGTGGT      | R-CTGTGTATGCATCGTGCTCTC   |
|                         | TFR1     | F-TCGTGAGGCTGGATCTCAAAA   | R-CCTTACTATACGCCACATAACCC |

**Table S2.** Physiological functions of the 24 proteins that bind to hNgb in a non-stress condition; unlabeled Co-IP MS/MS experiment.

|        |                                                                                                                                                                                                                                                                                                                                 |
|--------|---------------------------------------------------------------------------------------------------------------------------------------------------------------------------------------------------------------------------------------------------------------------------------------------------------------------------------|
| P63104 | <b>14-3-3 protein zeta/delta</b><br>Adapter protein implicated in intracellular signaling, apoptosis, cell division and differentiation. As such the protein has been found implicated in neuronal disorders as Creutzfeldt–Jakob disease, Alzheimer’s disease (AD), neuronal migration defects and polyglutamine diseases [1]. |
| P62701 | <b>40S ribosomal protein S4, X isoform</b><br>Cytoplasmic protein enhancing cell proliferation and translation [2]. The protein is upregulated in plaque tissue of multiple sclerosis [3].                                                                                                                                      |
| P08865 | <b>40S ribosomal protein SA</b><br>Levels of this protein are positively associated with cell survival; i.e. both the generation of neoplasms as the protection of neurons against apoptosis-inducing stimuli [4].                                                                                                              |
| P18124 | <b>60S ribosomal protein L7</b><br>Structural constituent of ribosomes, involved in translation.                                                                                                                                                                                                                                |
| P61313 | <b>60S ribosomal protein L15</b><br>A large deletion in the <i>RPL15</i> gene is causative for the development of Diamond-Blackfan anemia [5]. The protein interacts with interferon-inducible protein p56 [6].                                                                                                                 |
| P83881 | <b>60S ribosomal protein L36a</b><br>Structural constituent of ribosomes, involved in translation.                                                                                                                                                                                                                              |
| P11021 | <b>78 kDa glucose-regulated protein</b><br>Cellular defense apparatus against protein misfolding with an altered expression in AD [7] and Amyotrophic Lateral Sclerosis (ALS) [8]. The protein has neurogenic functions as well [9].                                                                                            |
| P68032 | <b>Actin</b><br>Actin is a highly conserved protein involved in synaptic dynamics [10] and axon degeneration through caspase-mediated cleavage. The latter may occur during development, the physiological turnover of neurons and neuronal injury [11].                                                                        |
| Q08211 | <b>ATP-dependent RNA helicase A</b><br>Nucleic acid helicase which, in addition, is involved in different forms of cell death: developmental apoptosis of neural progenitors [12] and pyroptosis as a host defense against viral infections [13].                                                                               |
| O75531 | <b>Barrier-to-autointegration factor</b><br>The protein is involved in chromatin decondensation and nuclear growth [14]. A homozygous mutation in <i>BANF1</i> causes Nestor-Guillermo progeria syndrome [15].                                                                                                                  |
| P12277 | <b>Creatine kinase B-type</b><br>Energy transfer protein which is upregulated during cerebellar postnatal development [16] and downregulated in AD and schizophrenia [17]. It activates neuron-specific K <sup>+</sup> -Cl <sup>-</sup> co-transporter KCC2 [17].                                                               |
| P06744 | <b>Glucose-6-phosphate isomerase</b><br>Glucose metabolism enzyme with a role in proteostasis [18] and motor neuron sprouting [19]. It has more general neurotrophic properties as well [20].                                                                                                                                   |
| P04792 | <b>Heat shock protein beta-1</b><br>Molecular chaperone with a role in the anterograde axonal transport of proteins [21] and mitochondria [22], VEGF-mediated angiogenesis [23], oxidative stress regulation, regulation of apoptosis, and the mediation of translational repression [24].                                      |
| P01834 | <b>Immunoglobulin kappa constant</b><br>Constant part of antibodies which gets significantly oxidized in AD affected serum [25] and is upregulated in inflammatory neuropathies [26].                                                                                                                                           |
| P07195 | <b>L-lactate dehydrogenase B chain</b><br>Part of the fermentation pathway that is involved in the brain energy metabolism [27].                                                                                                                                                                                                |
| P67809 | <b>Nuclease-sensitive element-binding protein 1</b><br>YB-1 is a protein with pleiotropic functions e.g. transcriptional regulation, DNA repair, cell proliferation, and stress responses to extracellular signals [28]. Moreover, it influences the pluripotency state of embryonic stem cells [29].                           |
| P00558 | <b>Phosphoglycerate kinase 1</b><br>Glycolytic enzyme of which the overexpression alleviates spinal muscular atrophy phenotypes [30]. It participates in angiogenesis by reducing plasmin [31] and is involved in cellular differentiation [32].                                                                                |
| P57721 | <b>Poly(rC)-binding protein 3</b><br>Alpha-CP3 has a role in post-transcriptional activities and functions as an iron chaperone [33]. Alpha-CP3 binds directly with ferritin and, hence, contributes to the iron deficiency response [33]. Splicing regulation of i.a. Tau, links Alpha-CP3                                     |

to tauopathy dementias [34].

**Receptor of activated protein C kinase 1**

P63244

Scaffold protein implicated in axon guidance and outgrowth [35], the protection against oxidative stress-induced apoptosis [36], G0/G1 cell division transitions [37] and the inhibition of phagocytosis [38]. RACK1 may contribute in the development of cytoplasmic inclusions in aggregation pathologies [39].

**RNA-binding protein EWS**

Q01844

Transcriptional repressor with a role in stem cell quiescence [40]. Disease-specific variants are aggregation-prone and may lead to ALS pathology [41].

**Transcription intermediary factor 1-beta**

Q13263

Scaffold protein which binds the transcription factor REST/NRSE, promoting neuronal differentiation [42]. TIF1-beta further regulates gene transcription through chromatin remodeling [43].

**Ubiquitin carboxyl-terminal hydrolase isozyme L1**

P09936

Protein involved in the autophagy/lysosomal pathway [44], maintaining the structure and function of the neuromuscular junction [45] and the physiological working of the endoplasmic reticulum [46]. Mutations in UCHL1 are associated with autosomal dominant Parkinson disease [47] and lowered UCHL1 levels are detected in ALS and AD as well [46].

**Vimentin**

P08670

Class-III intermediate filament which promotes axonal growth and branching [48], and negatively regulates peripheral nerve myelination [49]. The protein is re-upregulated in regions with plaque pathology, repairing atrophic dendrites and their lost synaptic connections [48].

**X-ray repair cross-complementing protein 6**

P12956

ATP-dependent helicase implicated in embryonic neurogenesis [50] and the production of IFN- $\lambda$ 1 [51]. Its expression levels are further correlated with telomere length [52]. Acetylated Ku70 induces caspase-dependent cell death [53]. It forms a heterodimer with X-ray repair cross-complementing protein 5 [54].

**Table S3.** Proteins identified to bind hNgb in only one of the two unstressed hNgb-EGFP samples, but which could be specific as they were not retrieved in the EGFP control samples; unlabeled Co-IP MS/MS experiment.

| 38 proteins identified solely in hNgb-EGFP S1 |                                                                      | 59 proteins identified solely in hNgb-EGFP S2 |                                                                             |
|-----------------------------------------------|----------------------------------------------------------------------|-----------------------------------------------|-----------------------------------------------------------------------------|
| TUBA1C                                        | Tubulin alpha-1C chain                                               | HIST2H2AB                                     | Histone H2A type 2-B                                                        |
| IGLC2                                         | Immunoglobulin lambda constant 2                                     | TUBB4A                                        | Tubulin beta-4A chain                                                       |
| HIST1H1E                                      | Histone H1.4                                                         | HIST1H2AA                                     | Histone H2A type 1-A                                                        |
| FUS                                           | RNA-binding protein FUS                                              | CFL1                                          | Cofilin-1                                                                   |
| C1QBP                                         | Complement component 1 Q subcomponent-binding protein, mitochondrial | DUT                                           | Deoxyuridine 5'-triphosphate nucleotide-hydrolase, mitochondrial            |
| HNRNPL                                        | Heterogeneous nuclear ribonucleoprotein L                            | RPL38                                         | 60S ribosomal protein L38                                                   |
| ALYREF                                        | THO complex subunit 4                                                | GSTP1                                         | Glutathione S-transferase P                                                 |
| XRCC5                                         | X-ray repair cross-complementing protein 5                           | PCBP1                                         | Poly(rC)-binding protein 1                                                  |
| EIF4A2                                        | Eukaryotic initiation factor 4A-II                                   | RPL10                                         | 60S ribosomal protein L10                                                   |
| HNRNPD                                        | Heterogeneous nuclear ribonucleoprotein D0                           | HMGB1                                         | High mobility group protein B1                                              |
| NOLC1                                         | Nucleolar and coiled-body phosphoprotein 1                           | TUBA4B                                        | Putative tubulin-like protein alpha-4B                                      |
| GDI1                                          | Rab GDP dissociation inhibitor alpha                                 | HNRNPA3                                       | Heterogeneous nuclear ribonucleoprotein A3                                  |
| TMPO                                          | Lamina-associated polypeptide 2, alpha                               | SSBP1                                         | Single-stranded DNA-binding protein                                         |
| RPLP2                                         | 60S acidic ribosomal protein P2                                      | SNU13                                         | NHP2-like protein 1                                                         |
| KIF5B                                         | Kinesin-1 heavy chain                                                | YWHAB                                         | 14-3-3 protein beta/alpha                                                   |
| HNRNPR                                        | Heterogeneous nuclear ribonucleoprotein R                            | TEX264                                        | Testis-expressed protein 264                                                |
| AHSG                                          | Alpha-2-HS-glycoprotein                                              | RPS3A                                         | 40S ribosomal protein S3a                                                   |
| MIF                                           | Macrophage migration inhibitory factor                               | IGLV3-19                                      | Immunoglobulin lambda variable 3-19                                         |
| HMGAI                                         | High mobility group protein HMG-I/HMG-Y                              | DPYSL2                                        | Dihydropyrimidinase-related protein 2                                       |
| PDIA3                                         | Protein disulfide-isomerase A3                                       | RPL34                                         | 60S ribosomal protein L34                                                   |
| MATR3                                         | Matrin-3                                                             | WBP11                                         | WW domain-binding protein 11                                                |
| RPA1                                          | Replication protein A 70 kDa DNA-binding subunit                     | YWHAE                                         | 14-3-3 protein epsilon                                                      |
| RPS7                                          | 40S ribosomal protein S7                                             | YWHAG                                         | 14-3-3 protein gamma                                                        |
| MKI67                                         | Proliferation marker protein Ki-67                                   | USP44                                         | Ubiquitin carboxyl-terminal hydrolase 44                                    |
| HNRNPA0                                       | Heterogeneous nuclear ribonucleoprotein A0                           | RPS13                                         | 40S ribosomal protein S13                                                   |
| HSPA9                                         | Stress-70 protein, mitochondrial                                     | KSR2                                          | Kinase suppressor of Ras 2                                                  |
| RPLP1                                         | 60S acidic ribosomal protein P1                                      | ENO2                                          | Gamma-enolase                                                               |
| CBX3                                          | Chromobox protein homolog 3                                          | MYL6B                                         | Myosin light chain 6B                                                       |
| ANXA2P2                                       | Putative annexin A2-like protein                                     | EIF4A1                                        | Eukaryotic initiation factor 4A-I                                           |
| KPNB1                                         | Importin subunit beta-1                                              | FSCN1                                         | Fascin                                                                      |
| RPL32                                         | 60S ribosomal protein L32                                            | RPL13A                                        | 60S ribosomal protein L13a                                                  |
| RPS19                                         | 40S ribosomal protein S19                                            | PRDX2                                         | Peroxiredoxin-2                                                             |
| U2AF1L5                                       | Splicing factor U2AF 35 kDa subunit-like protein                     | KIAA1614                                      | Uncharacterized protein KIAA1614                                            |
| CRMP1                                         | Dihydropyrimidinase-related protein 1                                | NAP1L1                                        | Nucleosome assembly protein 1-like 1                                        |
| SRSF3                                         | Serine/arginine-rich splicing factor 3                               | RPA2                                          | Replication protein A 32 kDa subunit                                        |
| TPR                                           | Nucleoprotein TPR                                                    | CCT4                                          | T-complex protein 1 subunit delta                                           |
| UVSSA                                         | UV-stimulated scaffold protein A                                     | PARK7                                         | Protein/nucleic acid deglycase DJ-1                                         |
| RALGAPA1                                      | Ral GTPase-activating protein subunit alpha-1                        | PDIA6                                         | Protein disulfide-isomerase A6                                              |
|                                               |                                                                      | ACTBL2                                        | Beta-actin-like protein 2                                                   |
|                                               |                                                                      | GNB3                                          | Guanine nucleotide-binding protein G(I)/G(S)/G(T) subunit beta-3            |
|                                               |                                                                      | RUVBL1                                        | RuvB-like 1                                                                 |
|                                               |                                                                      | RPLP0                                         | 60S acidic ribosomal protein P0                                             |
|                                               |                                                                      | PLXNA4                                        | Plexin-A4                                                                   |
|                                               |                                                                      | RPL5                                          | 60S ribosomal protein L5                                                    |
|                                               |                                                                      | ATP5B                                         | ATP synthase subunit beta, mitochondrial                                    |
|                                               |                                                                      | KHDRBS1                                       | KH domain-containing, RNA-binding, signal transduction-associated protein 1 |
|                                               |                                                                      | ATP5A1                                        | ATP synthase subunit alpha, mitochondrial                                   |
|                                               |                                                                      | ALDOA                                         | Fructose-bisphosphate aldolase A                                            |
|                                               |                                                                      | CCT6A                                         | T-complex protein 1 subunit zeta                                            |
|                                               |                                                                      | PDIA4                                         | Protein disulfide-isomerase A4                                              |
|                                               |                                                                      | CCT8                                          | T-complex protein 1 subunit theta                                           |
|                                               |                                                                      | CCT3                                          | T-complex protein 1 subunit gamma                                           |
|                                               |                                                                      | UBA1                                          | Ubiquitin-like modifier-activating enzyme 1                                 |
|                                               |                                                                      | KBTBD3                                        | Kelch repeat and BTB domain-containing protein 3                            |
|                                               |                                                                      | SMC3                                          | Structural maintenance of chromosomes protein 3                             |

|        |                                                                            |
|--------|----------------------------------------------------------------------------|
| NACA   | Nascent polypeptide-associated complex subunit alpha, muscle-specific form |
| LRPPRC | Leucine-rich PPR motif-containing protein, mitochondrial                   |
| FASN   | Fatty acid synthase                                                        |
| MUC16  | Mucin-16                                                                   |

**Table S4.** Physiological functions of the 10 proteins that were identified in the SILAC experiment as hNgb-binders.

|        |                                                                                                                                                                                                                                                                                                                                                                                                 |
|--------|-------------------------------------------------------------------------------------------------------------------------------------------------------------------------------------------------------------------------------------------------------------------------------------------------------------------------------------------------------------------------------------------------|
| P62081 | <b>40S ribosomal protein S7</b><br>Ribosomal protein linked to the cellular apoptosis process through abrogation of oncogene MDM2-mediated p53 ubiquitination [55]. Mutation variants are linked to Diamond-Blackfan anemia [5].                                                                                                                                                                |
| Q08211 | <b>ATP-dependent RNA helicase A</b><br>Protein detected in both the non-SILAC and SILAC experiment. Nucleic acid helicase which, in addition, is involved in different forms of cell death: developmental apoptosis of neural progenitors [12] and pyroptosis as a host defense against viral infections [13].                                                                                  |
| Q15018 | <b>BRISC complex subunit Abraxas 2</b><br>Brcc36-containing isopeptidase complex unit which is involved in deubiquitinating proteins. Through this function it regulates p53 activity [56] and interferon-dependent responses [57].                                                                                                                                                             |
| Q9NZB2 | <b>Constitutive coactivator of PPAR-gamma-like protein 1</b><br>Scaffold protein involved in phosphorylation cascades of the FAK and PI3K/AKT/mTOR pathways [58], with downstream the Akt-mediated antiapoptotic cascade [59]. It promotes secretion of neurotrophic IGF2 [59] and interacts with kinesins responsible for transporting molecular cargo [58].                                   |
| P84090 | <b>Enhancer of rudimentary homolog</b><br>Protein that is linked to mRNA splicing, the replication stress response, the cell cycle, and optimal cell growth under stress conditions [60].                                                                                                                                                                                                       |
| P51991 | <b>Heterogeneous nuclear ribonucleoprotein A3</b><br>Protein is actively 'recruited' in protein aggregates in C9orf72-linked frontotemporal lobar degeneration and motor neuron disease [61]. Reduced levels of hnRNPA3 induce cellular senescence, e.g. reduction in cell growth, the upsurge in dsDNA breaks, and the increase of p53 and p21/WAF1 proteins [62].                             |
| P52272 | <b>Heterogeneous nuclear ribonucleoprotein M</b><br>Pre-mRNA binding protein linked to spinal muscular atrophy [63]. It also functions as a cell surface adhesion receptor, making it function in an ephrin receptor-like way to regulate axonal targeting [64].                                                                                                                                |
| Q9P0L0 | <b>Vesicle-associated membrane protein-associated protein A</b><br>Integral membrane protein known to function in the regulation of sterol, lipid biosynthesis and vesicle trafficking. It binds the electromotility protein prestin [65] and protrudin [66], making VAPA involved in the neurite outgrowth process. Plays a role in the pathophysiology of amyotrophic lateral sclerosis [67]. |
| P08670 | <b>Vimentin</b><br>Protein detected in both the non-SILAC and SILAC experiment. Class-III intermediate filament which promotes axonal growth and branching [48], and negatively regulates peripheral nerve myelination [49]. The protein is re-upregulated in regions with plaque pathology, repairing atrophic dendrites and their lost synaptic connections [48].                             |
| P13010 | <b>X-ray repair cross-complementing protein 5</b><br>Helicase of which the levels are positively correlated with longevity [54]. It forms a heterodimer with X-ray repair cross-complementing protein 6 [54]. As such XRCC5 is involved in embryonic neurogenesis [50].                                                                                                                         |

**Table S5.** Proteins identified to bind hNgb in only the forward or reverse SILAC experiment, but which could be specific as they were not retrieved in the EGFP control samples.

| Elements found in either the "Forward" or "Reverse" experiment |                                                                                                   | Abundances: Forward |            |       | Abundances: Reverse |            |      |
|----------------------------------------------------------------|---------------------------------------------------------------------------------------------------|---------------------|------------|-------|---------------------|------------|------|
|                                                                |                                                                                                   | Stress              | Non-stress | S/NS  | Stress              | Non-stress | S/NS |
| RTL1                                                           | Retrotransposon-like protein 1                                                                    | 2,28E+05            | NA         | n.a.  | n.a.                | n.a.       | n.a. |
| CNBP                                                           | Cellular nucleic acid-binding protein                                                             | NA                  | 1,56E+06   | n.a.  | n.a.                | n.a.       | n.a. |
| RUFY1                                                          | RUN & FYVE domain-containing protein 1                                                            | 3,96E+07            | 1,87E+07   | 2,12  | n.a.                | n.a.       | n.a. |
| RUFY3                                                          | Protein RUFY3                                                                                     | NA                  | NA         | n.a.  | n.a.                | n.a.       | n.a. |
| PFN2                                                           | Profilin-2                                                                                        | 2,51E+06            | NA         | n.a.  | n.a.                | n.a.       | n.a. |
| HP                                                             | Haptoglobin                                                                                       | NA                  | NA         | n.a.  | n.a.                | n.a.       | n.a. |
| SNRPC                                                          | U1 small nuclear ribonucleoprotein C                                                              | NA                  | NA         | n.a.  | n.a.                | n.a.       | n.a. |
| YTHDF3                                                         | YTH domain-containing family protein 3                                                            | 5,95E+06            | 3,18E+05   | 18,70 | n.a.                | n.a.       | n.a. |
| DLST                                                           | Dihydrolypoyllysine-residue succinyltransferase component of 2-oxoglutarate dehydrogenase complex | 1,67E+06            | NA         | n.a.  | n.a.                | n.a.       | n.a. |
| TBC1D5                                                         | TBC1 domain family member 5                                                                       | 1,90E+06            | 1,16E+06   | 1,64  | n.a.                | n.a.       | n.a. |
| RPL30                                                          | 60S ribosomal protein L30                                                                         | NA                  | NA         | n.a.  | n.a.                | n.a.       | n.a. |
| VAPB                                                           | Vesicle-associated membrane protein-associated protein B/C                                        | 3,88E+07            | 1,79E+07   | 2,16  | n.a.                | n.a.       | n.a. |
| WTAP                                                           | Pre-mRNA-splicing regulator WTAP                                                                  | 3,15E+06            | 1,12E+06   | 2,80  | n.a.                | n.a.       | n.a. |
| SNRPF                                                          | Small nuclear ribonucleoprotein F                                                                 | NA                  | NA         | n.a.  | n.a.                | n.a.       | n.a. |
| YBX1                                                           | Nuclease-sensitive element-binding protein 1                                                      | 1,09E+06            | 4,89E+05   | 2,23  | n.a.                | n.a.       | n.a. |
| MT1G                                                           | Metallothionein-1G                                                                                | NA                  | 1,69E+06   | n.a.  | n.a.                | n.a.       | n.a. |
| SNRPD3                                                         | Small nuclear ribonucleoprotein Sm D3                                                             | 1,99E+07            | 5,54E+06   | 3,59  | n.a.                | n.a.       | n.a. |
| HSPA9                                                          | Stress-70 protein, mitochondrial                                                                  | NA                  | NA         | n.a.  | n.a.                | n.a.       | n.a. |
| SNRPD2                                                         | Small nuclear ribonucleoprotein Sm D2                                                             | 5,46E+06            | NA         | n.a.  | n.a.                | n.a.       | n.a. |
| RUVBL1                                                         | RuvB-like 1                                                                                       | NA                  | NA         | n.a.  | n.a.                | n.a.       | n.a. |
| TRIM28                                                         | Transcription intermediary factor 1-beta                                                          | 2,37E+07            | 7,03E+06   | 3,38  | n.a.                | n.a.       | n.a. |
| SNRPA                                                          | U1 small nuclear ribonucleoprotein A                                                              | 4,58E+07            | 8,71E+06   | 5,26  | n.a.                | n.a.       | n.a. |
| SRSF8                                                          | Serine/arginine-rich splicing factor 8                                                            | NA                  | NA         | n.a.  | n.a.                | n.a.       | n.a. |
| CCT6A                                                          | T-complex protein 1 subunit zeta                                                                  | 3,43E+05            | NA         | n.a.  | n.a.                | n.a.       | n.a. |
| IGKV1-5                                                        | Immunoglobulin kappa variable 1-5                                                                 | NA                  | NA         | n.a.  | n.a.                | n.a.       | n.a. |
| ITIH3                                                          | Inter-alpha-trypsin inhibitor heavy chain H3                                                      | NA                  | NA         | n.a.  | n.a.                | n.a.       | n.a. |
| PTBP1                                                          | Polypyrimidine tract-binding protein 1                                                            | NA                  | NA         | n.a.  | n.a.                | n.a.       | n.a. |
| CNTNAP4                                                        | Contactin-associated protein-like 4                                                               | 2,49E+07            | NA         | n.a.  | n.a.                | n.a.       | n.a. |
| IGHG4                                                          | Immunoglobulin heavy constant gamma 4                                                             | NA                  | NA         | n.a.  | n.a.                | n.a.       | n.a. |
| RPLP0                                                          | 60S acidic ribosomal protein P0                                                                   | 2,58E+06            | 4,70E+05   | 5,48  | n.a.                | n.a.       | n.a. |
| HNRNPL                                                         | Heterogeneous nuclear ribonucleoprotein L                                                         | 7,89E+06            | 1,36E+06   | 5,79  | n.a.                | n.a.       | n.a. |
| TUBA4B                                                         | Putative tubulin-like protein alpha-4B                                                            | 1,53E+07            | 2,52E+06   | 6,10  | n.a.                | n.a.       | n.a. |
| TF                                                             | Serotransferrin                                                                                   | 2,21E+06            | NA         | n.a.  | n.a.                | n.a.       | n.a. |
| HNRNPD                                                         | Heterogeneous nuclear ribonucleoprotein D0                                                        | 1,11E+07            | 2,31E+06   | 4,78  | n.a.                | n.a.       | n.a. |
| CCT5                                                           | T-complex protein 1 subunit epsilon                                                               | NA                  | NA         | n.a.  | n.a.                | n.a.       | n.a. |
| CBX3                                                           | Chromobox protein homolog 3                                                                       | NA                  | NA         | n.a.  | n.a.                | n.a.       | n.a. |
| HIST2H2AB                                                      | Histone H2A type 2-B                                                                              | n.a.                | n.a.       | n.a.  | 3,57E+08            | 1,10E+09   | 0,32 |
| TUBA1A                                                         | Tubulin alpha-1A chain                                                                            | n.a.                | n.a.       | n.a.  | NA                  | NA         | NA   |
| HSPB1                                                          | Heat shock protein beta-1                                                                         | n.a.                | n.a.       | n.a.  | NA                  | 1,18E+06   | n.a. |
| PCBP3                                                          | Poly(rC)-binding protein 3                                                                        | n.a.                | n.a.       | n.a.  | NA                  | 4,67E+05   | n.a. |
| SNRPD1                                                         | Small nuclear ribonucleoprotein Sm D1                                                             | n.a.                | n.a.       | n.a.  | NA                  | NA         | n.a. |
| RPL38                                                          | 60S ribosomal protein L38                                                                         | n.a.                | n.a.       | n.a.  | 8,00E+05            | 8,53E+05   | 0,94 |
| MYH10                                                          | Myosin-10                                                                                         | n.a.                | n.a.       | n.a.  | NA                  | NA         | n.a. |
| MYH9                                                           | Myosin-9                                                                                          | n.a.                | n.a.       | n.a.  | NA                  | NA         | n.a. |
| PDIA3                                                          | Protein disulfide-isomerase A3                                                                    | n.a.                | n.a.       | n.a.  | NA                  | NA         | n.a. |
| BANF1                                                          | Barrier-to-autointegration factor                                                                 | n.a.                | n.a.       | n.a.  | NA                  | 2,73E+07   | n.a. |



|          |                                                       |      |      |      |          |          |      |
|----------|-------------------------------------------------------|------|------|------|----------|----------|------|
| GPI      | Glucose-6-phosphate isomerase                         | n.a. | n.a. | n.a. | NA       | 3,80E+05 | n.a. |
| MAP4     | Microtubule-associated protein 4                      | n.a. | n.a. | n.a. | NA       | 9,15E+05 | n.a. |
| RPL26    | 60S ribosomal protein L26                             | n.a. | n.a. | n.a. | NA       | NA       | n.a. |
| ALYREF   | THO complex subunit 4                                 | n.a. | n.a. | n.a. | NA       | 1,52E+05 | n.a. |
| SLC25A31 | ADP/ATP translocase 4                                 | n.a. | n.a. | n.a. | NA       | NA       | n.a. |
| RPL7     | 60S ribosomal protein L7                              | n.a. | n.a. | n.a. | NA       | NA       | n.a. |
| RPLP2    | 60S acidic ribosomal protein P2                       | n.a. | n.a. | n.a. | NA       | NA       | n.a. |
| ANXA1    | Annexin A1                                            | n.a. | n.a. | n.a. | NA       | 3,16E+06 | n.a. |
| NOLC1    | Nucleolar and coiled-body phosphoprotein 1            | n.a. | n.a. | n.a. | 5,44E+05 | 2,92E+05 | 1,86 |
| HADHA    | Trifunctional enzyme subunit $\alpha$ , mitochondrial | n.a. | n.a. | n.a. | NA       | NA       | n.a. |
| HSP90B1  | Endoplasmic                                           | n.a. | n.a. | n.a. | NA       | 6,31E+05 | n.a. |
| MYL6B    | Myosin light chain 6B                                 | n.a. | n.a. | n.a. | NA       | NA       | n.a. |
| SNU13    | NHP2-like protein 1                                   | n.a. | n.a. | n.a. | NA       | NA       | n.a. |
| XRCC6    | X-ray repair cross-complementing protein 6            | n.a. | n.a. | n.a. | NA       | 3,52E+05 | n.a. |
| FASN     | Fatty acid synthase                                   | n.a. | n.a. | n.a. | NA       | NA       | n.a. |
| HMG1     | Non-histone chromosomal protein HMG-14                | n.a. | n.a. | n.a. | NA       | NA       | n.a. |

NA: no abundance value available, i.e. when there is a good MS2 available but the MS1 level peak is not sufficiently reliable for integration (e.g. due to co-elution of another peptide, resulting in "shoulder formation"). n.a. = not applicable

## References

---

1. Berg, D.; Holzmann, C.; Riess, O. 14-3-3 proteins in the nervous system. *Nat Rev Neurosci* **2003**, *4*, 752-762, doi:10.1038/nrn1197.
2. Watanabe, M.; Furuno, N.; Goebel, M.; Go, M.; Miyauchi, K.; Sekiguchi, T.; Basilico, C.; Nishimoto, T. Molecular cloning of the human gene, CCG2, that complements the BHK-derived temperature-sensitive cell cycle mutant tsBN63: identity of CCG2 with the human X chromosomal SCAR/RPS4X gene. *J Cell Sci* **1991**, *100* ( Pt 1), 35-43.
3. Tajouri, L.; Mellick, A.S.; Ashton, K.J.; Tannenberg, A.E.; Nagra, R.M.; Tourtellotte, W.W.; Griffiths, L.R. Quantitative and qualitative changes in gene expression patterns characterize the activity of plaques in multiple sclerosis. *Brain Res Mol Brain Res* **2003**, *119*, 170-183.
4. Meloni, B.P.; Tilbrook, P.A.; Boulos, S.; Arthur, P.G.; Knuckey, N.W. Erythropoietin preconditioning in neuronal cultures: signaling, protection from in vitro ischemia, and proteomic analysis. *J Neurosci Res* **2006**, *83*, 584-593, doi:10.1002/jnr.20755.
5. Landowski, M.; O'Donohue, M.F.; Buros, C.; Ghazvinian, R.; Montel-Lehry, N.; Vlachos, A.; Sieff, C.A.; Newburger, P.E.; Niewiadomska, E.; Matysiak, M., et al. Novel deletion of RPL15 identified by array-comparative genomic hybridization in Diamond-Blackfan anemia. *Hum Genet* **2013**, *132*, 1265-1274, doi:10.1007/s00439-013-1326-z.
6. Hsu, Y.A.; Lin, H.J.; Sheu, J.J.; Shieh, F.K.; Chen, S.Y.; Lai, C.H.; Tsai, F.J.; Wan, L.; Chen, B.H. A novel interaction between interferon-inducible protein p56 and ribosomal protein L15 in gastric cancer cells. *DNA Cell Biol* **2011**, *30*, 671-679, doi:10.1089/dna.2010.1149.
7. Chen, S.; Lu, F.F.; Seeman, P.; Liu, F. Quantitative proteomic analysis of human substantia nigra in Alzheimer's disease, Huntington's disease and Multiple sclerosis. *Neurochem Res* **2012**, *37*, 2805-2813, doi:10.1007/s11064-012-0874-2.
8. Filareti, M.; Luotti, S.; Pasetto, L.; Pignataro, M.; Paoletta, K.; Messina, P.; Pupillo, E.; Filosto, M.; Lunetta, C.; Mandrioli, J., et al. Decreased Levels of Foldase and Chaperone Proteins Are Associated with an Early-Onset Amyotrophic Lateral Sclerosis. *Front Mol Neurosci* **2017**, *10*, 99, doi:10.3389/fnmol.2017.00099.
9. Bestman, J.E.; Huang, L.C.; Lee-Osbourne, J.; Cheung, P.; Cline, H.T. An in vivo screen to identify candidate neurogenic genes in the developing *Xenopus* visual system. *Dev Biol* **2015**, *408*, 269-291, doi:10.1016/j.ydbio.2015.03.010.
10. D'Ambrosi, N.; Rossi, S.; Gerbino, V.; Cozzolino, M. Rac1 at the crossroad of actin dynamics and neuroinflammation in Amyotrophic Lateral Sclerosis. *Front Cell Neurosci* **2014**, *8*, 279, doi:10.3389/fncel.2014.00279.
11. Sokolowski, J.D.; Gamage, K.K.; Heffron, D.S.; Leblanc, A.C.; Deppmann, C.D.; Mandell, J.W. Caspase-mediated cleavage of actin and tubulin is a common feature and sensitive marker of axonal degeneration in neural development and injury. *Acta Neuropathol Commun* **2014**, *2*, 16, doi:10.1186/2051-5960-2-16.
12. Chen, Z.X.; Wallis, K.; Fell, S.M.; Sobrado, V.R.; Hemmer, M.C.; Ramskold, D.; Hellman, U.; Sandberg, R.; Kenchappa, R.S.; Martinson, T., et al. RNA helicase A is a downstream mediator of KIF1Bbeta tumor-suppressor function in neuroblastoma. *Cancer Discov* **2014**, *4*, 434-451, doi:10.1158/2159-8290.CD-13-0362.
13. Zhu, S.; Ding, S.; Wang, P.; Wei, Z.; Pan, W.; Palm, N.W.; Yang, Y.; Yu, H.; Li, H.B.; Wang, G., et al. Nlrp9b inflammasome restricts rotavirus infection in intestinal epithelial cells. *Nature* **2017**, *546*, 667-670, doi:10.1038/nature22967.
14. Segura-Totten, M.; Kowalski, A.K.; Craigie, R.; Wilson, K.L. Barrier-to-autointegration factor: major roles in chromatin decondensation and nuclear assembly. *J Cell Biol* **2002**, *158*, 475-485, doi:10.1083/jcb.200202019.
15. Puente, X.S.; Quesada, V.; Osorio, F.G.; Cabanillas, R.; Cadinanos, J.; Fraile, J.M.; Ordonez, G.R.; Puente, D.A.; Gutierrez-Fernandez, A.; Fanjul-Fernandez, M., et al. Exome sequencing and functional analysis identifies BANF1 mutation as the cause of a hereditary progeroid syndrome. *Am J Hum Genet* **2011**, *88*, 650-656, doi:10.1016/j.ajhg.2011.04.010.
16. Shen, W.; Willis, D.; Zhang, Y.; Schlattner, U.; Wallimann, T.; Molloy, G.R. Expression of creatine kinase isoenzyme genes during postnatal development of rat brain cerebellum: evidence for transcriptional regulation. *Biochem J* **2002**, *367*, 369-380, doi:10.1042/BJ20020709.
17. Inoue, K.; Yamada, J.; Ueno, S.; Fukuda, A. Brain-type creatine kinase activates neuron-specific K<sup>+</sup>-Cl<sup>-</sup>-co-transporter KCC2. *J Neurochem* **2006**, *96*, 598-608, doi:10.1111/j.1471-4159.2005.03560.x.
18. Knight, A.L.; Yan, X.; Hamamichi, S.; Ajjuri, R.R.; Mazzulli, J.R.; Zhang, M.W.; Daigle, J.G.; Zhang, S.; Borom, A.R.; Roberts, L.R., et al. The glycolytic enzyme, GPI, is a functionally conserved modifier of

- dopaminergic neurodegeneration in Parkinson's models. *Cell Metab* **2014**, *20*, 145-157, doi:10.1016/j.cmet.2014.04.017.
19. English, A.W. Cytokines, growth factors and sprouting at the neuromuscular junction. *J Neurocytol* **2003**, *32*, 943-960, doi:10.1023/B:NEUR.0000020634.59639.cf.
  20. Kugler, W.; Breme, K.; Laspe, P.; Muirhead, H.; Davies, C.; Winkler, H.; Schroter, W.; Lakomek, M. Molecular basis of neurological dysfunction coupled with haemolytic anaemia in human glucose-6-phosphate isomerase (GPI) deficiency. *Hum Genet* **1998**, *103*, 450-454.
  21. Holmgren, A.; Bouhy, D.; De Winter, V.; Asselbergh, B.; Timmermans, J.P.; Irobi, J.; Timmerman, V. Charcot-Marie-Tooth causing HSPB1 mutations increase Cdk5-mediated phosphorylation of neurofilaments. *Acta Neuropathol* **2013**, *126*, 93-108, doi:10.1007/s00401-013-1133-6.
  22. Kalmar, B.; Innes, A.; Wanisch, K.; Kolaszynska, A.K.; Pandraud, A.; Kelly, G.; Abramov, A.Y.; Reilly, M.M.; Schiavo, G.; Greensmith, L. Mitochondrial deficits and abnormal mitochondrial retrograde axonal transport play a role in the pathogenesis of mutant Hsp27-induced Charcot Marie Tooth Disease. *Hum Mol Genet* **2017**, *26*, 3313-3326, doi:10.1093/hmg/ddx216.
  23. Lee, Y.J.; Lee, H.J.; Choi, S.H.; Jin, Y.B.; An, H.J.; Kang, J.H.; Yoon, S.S.; Lee, Y.S. Soluble HSPB1 regulates VEGF-mediated angiogenesis through their direct interaction. *Angiogenesis* **2012**, *15*, 229-242, doi:10.1007/s10456-012-9255-3.
  24. Geuens, T.; De Winter, V.; Rajan, N.; Achsel, T.; Mateiu, L.; Almeida-Souza, L.; Asselbergh, B.; Bouhy, D.; Auer-Grumbach, M.; Bagni, C., et al. Mutant HSPB1 causes loss of translational repression by binding to PCBP1, an RNA binding protein with a possible role in neurodegenerative disease. *Acta Neuropathol Commun* **2017**, *5*, 5, doi:10.1186/s40478-016-0407-3.
  25. Shen, L.; Chen, Y.; Yang, A.; Chen, C.; Liao, L.; Li, S.; Ying, M.; Tian, J.; Liu, Q.; Ni, J. Redox Proteomic Profiling of Specifically Carbonylated Proteins in the Serum of Triple Transgenic Alzheimer's Disease Mice. *Int J Mol Sci* **2016**, *17*, 469, doi:10.3390/ijms17040469.
  26. Steck, A.J.; Kinter, J.; Renaud, S. Differential gene expression in nerve biopsies of inflammatory neuropathies. *J Peripher Nerv Syst* **2011**, *16 Suppl 1*, 30-33, doi:10.1111/j.1529-8027.2011.00302.x.
  27. Duka, T.; Collins, Z.; Anderson, S.M.; Raghanti, M.A.; Ely, J.J.; Hof, P.R.; Wildman, D.E.; Goodman, M.; Grossman, L.I.; Sherwood, C.C. Divergent lactate dehydrogenase isoenzyme profile in cellular compartments of primate forebrain structures. *Mol Cell Neurosci* **2017**, *82*, 137-142, doi:10.1016/j.mcn.2017.04.007.
  28. Kohno, K.; Izumi, H.; Uchiumi, T.; Ashizuka, M.; Kuwano, M. The pleiotropic functions of the Y-box-binding protein, YB-1. *Bioessays* **2003**, *25*, 691-698, doi:10.1002/bies.10300.
  29. Guo, C.; Xue, Y.; Yang, G.; Yin, S.; Shi, W.; Cheng, Y.; Yan, X.; Fan, S.; Zhang, H.; Zeng, F. Nanog RNA-binding proteins YBX1 and ILF3 affect pluripotency of embryonic stem cells. *Cell Biol Int* **2016**, *40*, 847-860, doi:10.1002/cbin.10539.
  30. Boyd, P.J.; Tu, W.Y.; Shorrock, H.K.; Groen, E.J.N.; Carter, R.N.; Powis, R.A.; Thomson, S.R.; Thomson, D.; Graham, L.C.; Motyl, A.A.L., et al. Bioenergetic status modulates motor neuron vulnerability and pathogenesis in a zebrafish model of spinal muscular atrophy. *PLoS Genet* **2017**, *13*, e1006744, doi:10.1371/journal.pgen.1006744.
  31. Lay, A.J.; Jiang, X.M.; Kisker, O.; Flynn, E.; Underwood, A.; Condron, R.; Hogg, P.J. Phosphoglycerate kinase acts in tumour angiogenesis as a disulphide reductase. *Nature* **2000**, *408*, 869-873, doi:10.1038/35048596.
  32. Buhrke, T.; Lengler, I.; Lampen, A. Analysis of proteomic changes induced upon cellular differentiation of the human intestinal cell line Caco-2. *Dev Growth Differ* **2011**, *53*, 411-426, doi:10.1111/j.1440-169X.2011.01258.x.
  33. Leidgens, S.; Bullough, K.Z.; Shi, H.; Li, F.; Shakoury-Elizeh, M.; Yabe, T.; Subramanian, P.; Hsu, E.; Natarajan, N.; Nandal, A., et al. Each member of the poly-r(C)-binding protein 1 (PCBP) family exhibits iron chaperone activity toward ferritin. *J Biol Chem* **2013**, *288*, 17791-17802, doi:10.1074/jbc.M113.460253.
  34. Wang, Y.; Gao, L.; Tse, S.W.; Andreadis, A. Heterogeneous nuclear ribonucleoprotein E3 modestly activates splicing of tau exon 10 via its proximal downstream intron, a hotspot for frontotemporal dementia mutations. *Gene* **2010**, *451*, 23-31, doi:10.1016/j.gene.2009.11.006.
  35. Kershner, L.; Welshhans, K. RACK1 regulates neural development. *Neural Regen Res* **2017**, *12*, 1036-1039, doi:10.4103/1673-5374.211175.
  36. Ma, J.; Wu, R.; Zhang, Q.; Wu, J.B.; Lou, J.; Zheng, Z.; Ding, J.Q.; Yuan, Z. DJ-1 interacts with RACK1 and protects neurons from oxidative-stress-induced apoptosis. *Biochem J* **2014**, *462*, 489-497, doi:10.1042/BJ20140235.
  37. Chang, B.Y.; Conroy, K.B.; Machleder, E.M.; Cartwright, C.A. RACK1, a receptor for activated C kinase and a homolog of the beta subunit of G proteins, inhibits activity of src tyrosine kinases and growth of NIH 3T3 cells. *Mol Cell Biol* **1998**, *18*, 3245-3256.

38. Thorslund, S.E.; Edgren, T.; Pettersson, J.; Nordfelth, R.; Sellin, M.E.; Ivanova, E.; Francis, M.S.; Isaksson, E.L.; Wolf-Watz, H.; Fallman, M. The RACK1 signaling scaffold protein selectively interacts with *Yersinia pseudotuberculosis* virulence function. *PLoS One* **2011**, *6*, e16784, doi:10.1371/journal.pone.0016784.
39. Russo, A.; Scardigli, R.; La Regina, F.; Murray, M.E.; Romano, N.; Dickson, D.W.; Wolozin, B.; Cattaneo, A.; Ceci, M. Increased cytoplasmic TDP-43 reduces global protein synthesis by interacting with RACK1 on polyribosomes. *Hum Mol Genet* **2017**, *26*, 1407-1418, doi:10.1093/hmg/ddx035.
40. Cho, J.; Shen, H.; Yu, H.; Li, H.; Cheng, T.; Lee, S.B.; Lee, B.C. Ewing sarcoma gene *Ews* regulates hematopoietic stem cell senescence. *Blood* **2011**, *117*, 1156-1166, doi:10.1182/blood-2010-04-279349.
41. Couthouis, J.; Hart, M.P.; Erion, R.; King, O.D.; Diaz, Z.; Nakaya, T.; Ibrahim, F.; Kim, H.J.; Mojsilovic-Petrovic, J.; Panossian, S., et al. Evaluating the role of the FUS/TLS-related gene *EWSR1* in amyotrophic lateral sclerosis. *Hum Mol Genet* **2012**, *21*, 2899-2911, doi:10.1093/hmg/dds116.
42. Lee, N.; Park, S.J.; Haddad, G.; Kim, D.K.; Park, S.M.; Park, S.K.; Choi, K.Y. Interactomic analysis of REST/NRSF and implications of its functional links with the transcription suppressor TRIM28 during neuronal differentiation. *Sci Rep* **2016**, *6*, 39049, doi:10.1038/srep39049.
43. Jakobsson, J.; Cordero, M.I.; Bisaz, R.; Groner, A.C.; Busskamp, V.; Bensadoun, J.C.; Cammas, F.; Losson, R.; Mansuy, I.M.; Sandi, C., et al. KAP1-mediated epigenetic repression in the forebrain modulates behavioral vulnerability to stress. *Neuron* **2008**, *60*, 818-831, doi:10.1016/j.neuron.2008.09.036.
44. Costes, S.; Gurlo, T.; Rivera, J.F.; Butler, P.C. UCHL1 deficiency exacerbates human islet amyloid polypeptide toxicity in beta-cells: evidence of interplay between the ubiquitin/proteasome system and autophagy. *Autophagy* **2014**, *10*, 1004-1014, doi:10.4161/auto.28478.
45. Chen, F.; Sugiura, Y.; Myers, K.G.; Liu, Y.; Lin, W. Ubiquitin carboxyl-terminal hydrolase L1 is required for maintaining the structure and function of the neuromuscular junction. *Proc Natl Acad Sci U S A* **2010**, *107*, 1636-1641, doi:10.1073/pnas.0911516107.
46. Jara, J.H.; Genc, B.; Cox, G.A.; Bohn, M.C.; Roos, R.P.; Macklis, J.D.; Ulupinar, E.; Ozdinler, P.H. Corticospinal Motor Neurons Are Susceptible to Increased ER Stress and Display Profound Degeneration in the Absence of UCHL1 Function. *Cereb Cortex* **2015**, *25*, 4259-4272, doi:10.1093/cercor/bhu318.
47. Leroy, E.; Boyer, R.; Auburger, G.; Leube, B.; Ulm, G.; Mezey, E.; Harta, G.; Brownstein, M.J.; Jonnalagada, S.; Chernova, T., et al. The ubiquitin pathway in Parkinson's disease. *Nature* **1998**, *395*, 451-452, doi:10.1038/26652.
48. Levin, E.C.; Acharya, N.K.; Sedeyn, J.C.; Venkataraman, V.; D'Andrea, M.R.; Wang, H.Y.; Nagele, R.G. Neuronal expression of vimentin in the Alzheimer's disease brain may be part of a generalized dendritic damage-response mechanism. *Brain Res* **2009**, *1298*, 194-207, doi:10.1016/j.brainres.2009.08.072.
49. Triolo, D.; Dina, G.; Taveggia, C.; Vaccari, I.; Porrello, E.; Rivellini, C.; Domi, T.; La Marca, R.; Cerri, F.; Bolino, A., et al. Vimentin regulates peripheral nerve myelination. *Development* **2012**, *139*, 1359-1367, doi:10.1242/dev.072371.
50. Gu, Y.; Sekiguchi, J.; Gao, Y.; Dikkes, P.; Frank, K.; Ferguson, D.; Hasty, P.; Chun, J.; Alt, F.W. Defective embryonic neurogenesis in Ku-deficient but not DNA-dependent protein kinase catalytic subunit-deficient mice. *Proc Natl Acad Sci U S A* **2000**, *97*, 2668-2673.
51. Sui, H.; Zhou, M.; Imamichi, H.; Jiao, X.; Sherman, B.T.; Lane, H.C.; Imamichi, T. STING is an essential mediator of the Ku70-mediated production of IFN-lambda1 in response to exogenous DNA. *Sci Signal* **2017**, *10*, doi:10.1126/scisignal.aah5054.
52. Rutten, E.P.; Gopal, P.; Wouters, E.F.; Franssen, F.M.; Hageman, G.J.; Vanfleteren, L.E.; Spruit, M.A.; Reynaert, N.L. Various Mechanistic Pathways Representing the Aging Process Are Altered in COPD. *Chest* **2016**, *149*, 53-61, doi:10.1378/chest.15-0645.
53. Subramanian, C.; Pipari, A.W., Jr.; Bian, X.; Castle, V.P.; Kwok, R.P. Ku70 acetylation mediates neuroblastoma cell death induced by histone deacetylase inhibitors. *Proc Natl Acad Sci U S A* **2005**, *102*, 4842-4847, doi:10.1073/pnas.0408351102.
54. Lorenzini, A.; Johnson, F.B.; Oliver, A.; Tresini, M.; Smith, J.S.; Hdeib, M.; Sell, C.; Cristofalo, V.J.; Stamato, T.D. Significant correlation of species longevity with DNA double strand break recognition but not with telomere length. *Mech Ageing Dev* **2009**, *130*, 784-792, doi:10.1016/j.mad.2009.10.004.
55. Chen, D.; Zhang, Z.; Li, M.; Wang, W.; Li, Y.; Rayburn, E.R.; Hill, D.L.; Wang, H.; Zhang, R. Ribosomal protein S7 as a novel modulator of p53-MDM2 interaction: binding to MDM2, stabilization of p53 protein, and activation of p53 function. *Oncogene* **2007**, *26*, 5029-5037, doi:10.1038/sj.onc.1210327.
56. Zhang, J.; Cao, M.; Dong, J.; Li, C.; Xu, W.; Zhan, Y.; Wang, X.; Yu, M.; Ge, C.; Ge, Z., et al. ABRO1 suppresses tumorigenesis and regulates the DNA damage response by stabilizing p53. *Nat Commun* **2014**, *5*, 5059, doi:10.1038/ncomms6059.

57. Zeqiraj, E.; Tian, L.; Piggott, C.A.; Pillon, M.C.; Duffy, N.M.; Ceccarelli, D.F.; Keszei, A.F.; Lorenzen, K.; Kurinov, I.; Orlicky, S., et al. Higher-Order Assembly of BRCC36-KIAA0157 Is Required for DUB Activity and Biological Function. *Mol Cell* **2015**, *59*, 970-983, doi:10.1016/j.molcel.2015.07.028.
58. Bartolome, R.A.; Garcia-Palmero, I.; Torres, S.; Lopez-Lucendo, M.; Balyasnikova, I.V.; Casal, J.I. IL13 Receptor alpha2 Signaling Requires a Scaffold Protein, FAM120A, to Activate the FAK and PI3K Pathways in Colon Cancer Metastasis. *Cancer Res* **2015**, *75*, 2434-2444, doi:10.1158/0008-5472.CAN-14-3650.
59. Tanaka, M.; Sasaki, K.; Kamata, R.; Hoshino, Y.; Yanagihara, K.; Sakai, R. A novel RNA-binding protein, Ossa/C9orf10, regulates activity of Src kinases to protect cells from oxidative stress-induced apoptosis. *Mol Cell Biol* **2009**, *29*, 402-413, doi:10.1128/MCB.01035-08.
60. Kavanaugh, G.; Zhao, R.; Guo, Y.; Mohni, K.N.; Glick, G.; Lacy, M.E.; Hutson, M.S.; Ascano, M.; Cortez, D. Enhancer of Rudimentary Homolog Affects the Replication Stress Response through Regulation of RNA Processing. *Mol Cell Biol* **2015**, *35*, 2979-2990, doi:10.1128/MCB.01276-14.
61. Davidson, Y.S.; Flood, L.; Robinson, A.C.; Nihei, Y.; Mori, K.; Rollinson, S.; Richardson, A.; Benson, B.C.; Jones, M.; Snowden, J.S., et al. Heterogeneous ribonuclear protein A3 (hnRNP A3) is present in dipeptide repeat protein containing inclusions in Frontotemporal Lobar Degeneration and Motor Neurone disease associated with expansions in C9orf72 gene. *Acta Neuropathol Commun* **2017**, *5*, 31, doi:10.1186/s40478-017-0437-5.
62. Comegna, M.; Succio, M.; Napolitano, M.; Vitale, M.; D'Ambrosio, C.; Scaloni, A.; Passaro, F.; Zambrano, N.; Cimino, F.; Faraonio, R. Identification of miR-494 direct targets involved in senescence of human diploid fibroblasts. *FASEB J* **2014**, *28*, 3720-3733, doi:10.1096/fj.13-239129.
63. Cho, S.; Moon, H.; Loh, T.J.; Oh, H.K.; Choy, H.E.; Song, W.K.; Chun, J.S.; Zheng, X.; Shen, H. hnRNP M facilitates exon 7 inclusion of SMN2 pre-mRNA in spinal muscular atrophy by targeting an enhancer on exon 7. *Biochim Biophys Acta* **2014**, *1839*, 306-315, doi:10.1016/j.bbagr.2014.02.006.
64. Lee, A.R.; Lamb, R.R.; Chang, J.H.; Erdmann-Gilmore, P.; Lichti, C.F.; Rohrs, H.W.; Malone, J.P.; Wairkar, Y.P.; DiAntonio, A.; Townsend, R.R., et al. Identification of potential mediators of retinotopic mapping: a comparative proteomic analysis of optic nerve from WT and Phr1 retinal knockout mice. *J Proteome Res* **2012**, *11*, 5515-5526, doi:10.1021/pr300767a.
65. Sengupta, S.; Miller, K.K.; Homma, K.; Edge, R.; Cheatham, M.A.; Dallos, P.; Zheng, J. Interaction between the motor protein prestin and the transporter protein VAPA. *Biochim Biophys Acta* **2010**, *1803*, 796-804, doi:10.1016/j.bbamcr.2010.03.017.
66. Saita, S.; Shirane, M.; Natume, T.; Iemura, S.; Nakayama, K.I. Promotion of neurite extension by protrudin requires its interaction with vesicle-associated membrane protein-associated protein. *J Biol Chem* **2009**, *284*, 13766-13777, doi:10.1074/jbc.M807938200.
67. Deidda, I.; Galizzi, G.; Passantino, R.; Cascio, C.; Russo, D.; Colletti, T.; La Bella, V.; Guarneri, P. Expression of vesicle-associated membrane-protein-associated protein B cleavage products in peripheral blood leukocytes and cerebrospinal fluid of patients with sporadic amyotrophic lateral sclerosis. *Eur J Neurol* **2014**, *21*, 478-485, doi:10.1111/ene.12334.
